# Supplementary material for: Metabolomic Signature of Coronary Artery Disease in Type 2 Diabetes Mellitus
Source: PubMed Central journal article supplement (PMC5350534; doi:10.1155/2017/7938216), 2017-03-02
Supplement: 7938216.f2.pdf [file 7938216.f2.pdf]

**Table S1** Mean values  $\pm$  SD for metabolite concentrations (stratified for CAD cases (CAD) and controls (non-CAD)) and ORs ratios for all metabolites being significantly associated with CAD ( $p < 0.05$ ) using logistic regression analysis (with age and gender used as covariates)

| <b>Metabolite</b> | <b>CAD<br/>Mean <math>\pm</math> SD</b> | <b>non-CAD<br/>Mean <math>\pm</math> SD</b> | <b>OR (95%CI)</b> | <b>p-value</b> |
|-------------------|-----------------------------------------|---------------------------------------------|-------------------|----------------|
| Serine            | 86.05 $\pm$ 18.89                       | 99.92 $\pm$ 20.37                           | 0.42 [0.18;0.88]  | 0.031          |
| PC aa C28:1       | 3.023 $\pm$ 0.740                       | 3.704 $\pm$ 0.983                           | 0.41 [0.17;0.86]  | 0.029          |
| PC aa C36:1       | 38.95 $\pm$ 9.40                        | 50.84 $\pm$ 12.23                           | 0.37 [0.15;0.78]  | 0.016          |
| PC aa C38:3       | 48.11 $\pm$ 13.40                       | 64.26 $\pm$ 16.64                           | 0.36 [0.14;0.79]  | 0.017          |
| PC ae C30:2       | 0.144 $\pm$ 0.026                       | 0.162 $\pm$ 0.036                           | 0.42 [0.17;0.88]  | 0.036          |
| PC ae C34:0       | 1.145 $\pm$ 0.314                       | 1.378 $\pm$ 0.305                           | 0.49 [0.23;0.96]  | 0.050          |
| PC ae C34:1       | 8.046 $\pm$ 1.509                       | 9.525 $\pm$ 1.984                           | 0.42 [0.18;0.86]  | 0.025          |
| PC ae C36:1       | 7.225 $\pm$ 1.452                       | 8.345 $\pm$ 1.680                           | 0.45 [0.21;0.87]  | 0.026          |
| PC ae C38:2       | 1.428 $\pm$ 0.283                       | 1.701 $\pm$ 0.413                           | 0.40 [0.17;0.82]  | 0.020          |
| PC ae C38:3       | 3.442 $\pm$ 0.790                       | 4.239 $\pm$ 1.048                           | 0.47 [0.20;0.94]  | 0.048          |
| PC ae C40:2       | 2.002 $\pm$ 0.444                       | 2.219 $\pm$ 0.513                           | 0.41 [0.17;0.82]  | 0.022          |
| PC ae C40:3       | 0.926 $\pm$ 0.184                       | 1.065 $\pm$ 0.213                           | 0.44 [0.19;0.87]  | 0.030          |
| SM (OH) C14:1     | 6.741 $\pm$ 1.431                       | 7.843 $\pm$ 1.749                           | 0.35 [0.14;0.73]  | 0.009          |
| SM (OH) C16:1     | 3.649 $\pm$ 0.690                       | 4.132 $\pm$ 1.020                           | 0.38 [0.15;0.82]  | 0.021          |
| SM (OH) C22:1     | 14.16 $\pm$ 2.55                        | 17.20 $\pm$ 4.00                            | 0.41 [0.16;0.89]  | 0.037          |
| SM (OH) C22:2     | 11.49 $\pm$ 2.09                        | 13.07 $\pm$ 2.78                            | 0.33 [0.12;0.75]  | 0.017          |

**Table S2** ORs ratios for metabolites being significantly associated with CAD ( $p < 0.05$ ) using logistic regression analysis stratified for CAD class ~ metabolite + age + sex + BMI + HbA1c + Diabetes duration + triglycerides + LDL/HDL-ratio + Albumin + antihypertensive therapy + SBP + DBP + lipid lowering agents + eGFR

| <b>Metabolites</b> | <b>CAD<br/>Mean <math>\pm</math> SD</b> | <b>Non-CAD<br/>Mean <math>\pm</math> SD</b> | <b>OR (95% CI)</b> | <b>p-value</b> |
|--------------------|-----------------------------------------|---------------------------------------------|--------------------|----------------|
| C0                 | 52.17 $\pm$ 15.94                       | 42.46 $\pm$ 11.72                           | 6.97 [1.70; 61.93] | 0.026          |
| Serine             | 86.05 $\pm$ 18.89                       | 99.92 $\pm$ 20.37                           | 0.15 [0.01;0.70]   | 0.045          |
| PC aa C36:1        | 38.95 $\pm$ 9.40                        | 50.84 $\pm$ 12.23                           | 0.16 [0.02;0.60]   | 0.020          |
| PC aa C38:3        | 48.11 $\pm$ 13.40                       | 64.26 $\pm$ 16.64                           | 0.21 [0.04;0.81]   | 0.045          |
| PC aa C40:4        | 3.09 $\pm$ 0.94                         | 4.25 $\pm$ 1.33                             | 0.17 [0.02;0.69]   | 0.036          |
| PC aa C40:5        | 10.35 $\pm$ 2.89                        | 13.37 $\pm$ 3.96                            | 0.19 [0.03;0.72]   | 0.028          |
| PC aa C42:6        | 0.51 $\pm$ 0.12                         | 0.57 $\pm$ 0.11                             | 0.19 [0.02;0.69]   | 0.045          |
| PC ae C38:2        | 1.43 $\pm$ 0.28                         | 1.70 $\pm$ 0.41                             | 0.18 [0.02;0.66]   | 0.033          |
| PC ae C42:2        | 2.00 $\pm$ 0.44                         | 2.23 $\pm$ 0.53                             | 0.26 [0.05;0.81]   | 0.046          |

**Table S3** Coefficients, Standard errors (SEs) and p-values for metabolites being significantly associated with CAD ( $p < 0.05$ ) using logistic regression analysis stratified for CAD class ~ metabolite + age + sex + BMI + HbA1c + Diabetes duration + triglycerides + LDL/HDL-ratio + Albumin + antihypertensive therapy + SBP + DBP + lipid lowering agents + eGFR.

| Metabolites | Coefficients | SEs  | p-value |
|-------------|--------------|------|---------|
| C0          | 1.94         | 0.87 | 0.026   |
| Serine      | -1.87        | 0.93 | 0.045   |
| PC aa C36:1 | -1.83        | 0.79 | 0.020   |
| PC aa C38:3 | -1.55        | 0.77 | 0.045   |
| PC aa C40:4 | -1.80        | 0.85 | 0.036   |
| PC aa C40:5 | -1.64        | 0.75 | 0.028   |
| PC aa C42:6 | -1.64        | 0.82 | 0.045   |
| PC ae C38:2 | -1.69        | 0.79 | 0.033   |
| PC ae C42:2 | -1.34        | 0.67 | 0.046   |
